# Supplementary material
Source: PubMed Central journal article supplement (PMC3131949)

# Supp Fig 1

## A

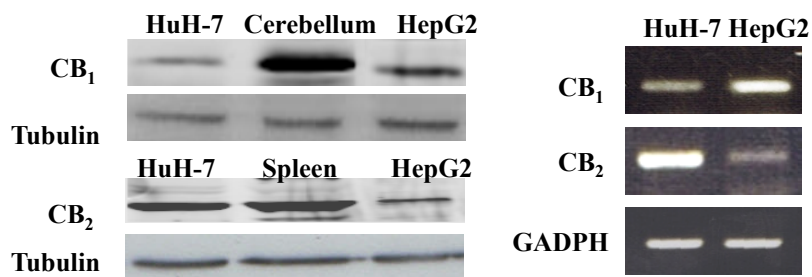

## B

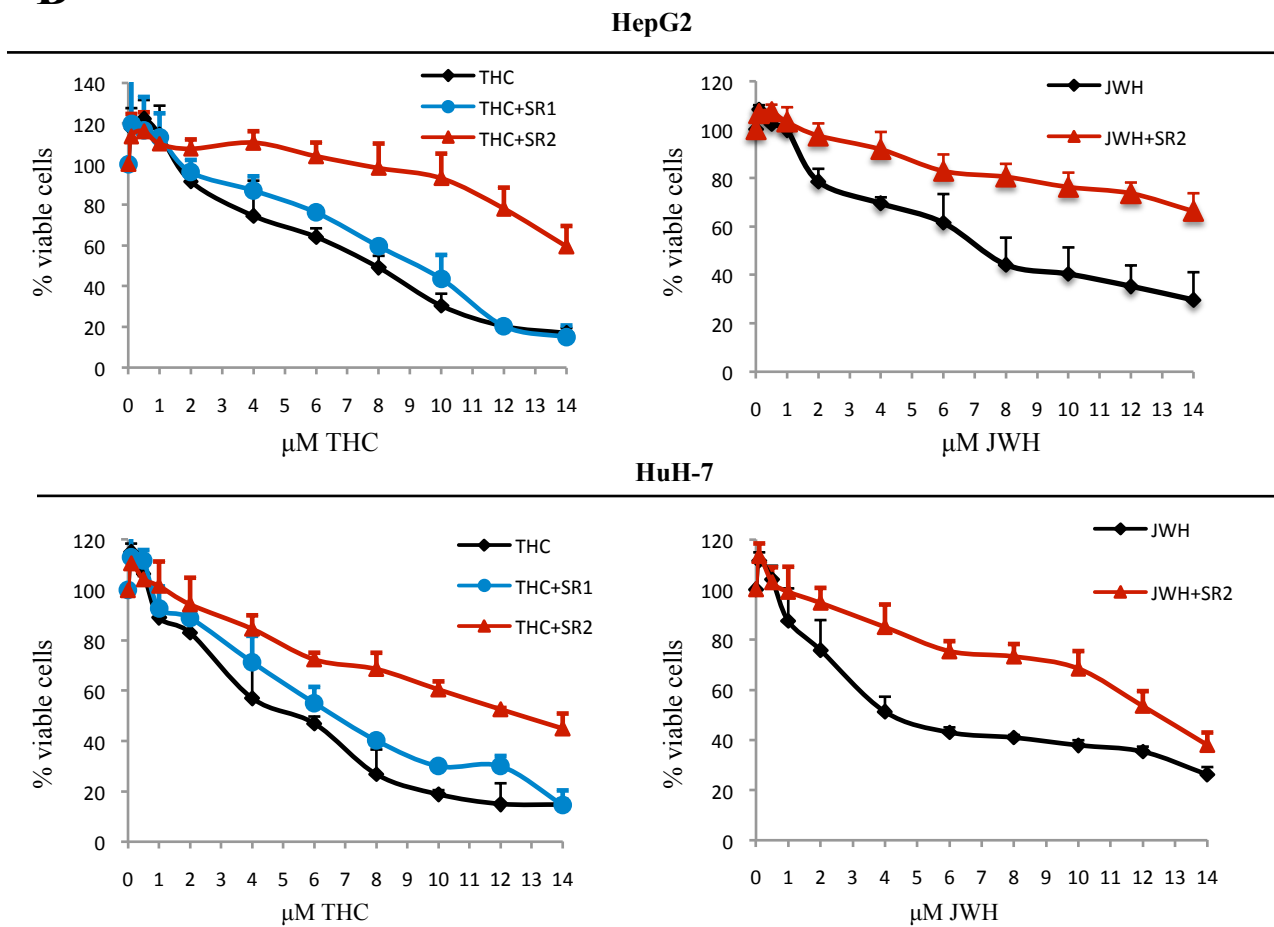

## C

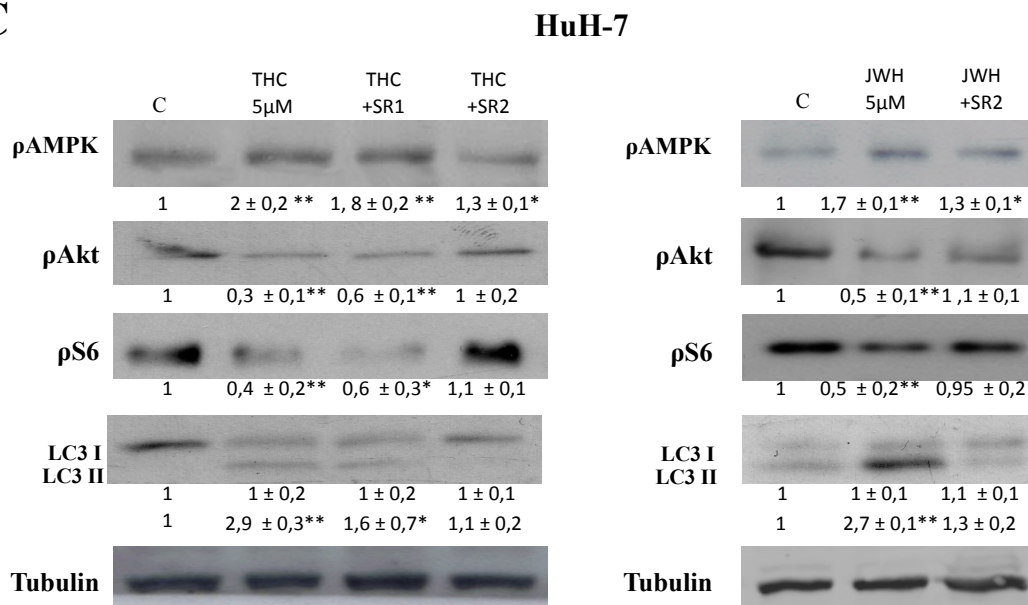

Supplement: cdd201132x1.pdf [file cdd201132x1.pdf]
